# Supplementary material
Source: publisher figshare collection journal article supplement (https://acs.figshare.com/ndownloader/files/4223503)
Supplement: Supplementary file 1 [file 4223503]

## Supporting Information

### Inhibition of TNF- $\alpha$ -Induced Inflammation by Andrographolide via

#### Down-Regulation of the PI3K/Akt Signaling Pathway

Haw-Wen Chen,<sup>†</sup> Ai-Hsuan Lin,<sup>‡</sup> Hsing-Chin Chu,<sup>‡</sup> Chien-Chun Li,<sup>‡</sup> Chia-Wen Tsai,<sup>†</sup>

Che-Yi Chao,<sup>§</sup> Chau-Jong Wang,<sup>⊥</sup> Chong-Kuei Lii,<sup>\*,†</sup> and Kai-Li Liu<sup>\*,‡,||</sup>

<sup>†</sup>Department of Nutrition, China Medical University, Taichung 404, Taiwan

<sup>‡</sup>Department of Nutrition, Chung Shan Medical University, Taichung 402, Taiwan

<sup>§</sup>Department of Health and Nutritional Biotechnology, Asia University, Taichung 413,  
Taiwan

<sup>⊥</sup>Institute of Biochemistry and Biotechnology, Chung Shan Medical University,  
Taichung 402, Taiwan

<sup>||</sup>Department of Dietitian, Chung Shan Medical University Hospital, Taichung 402,  
Taiwan

## Contents

**Figure S1.** Effects of andrographolide (**1**) and LY294002 on NF- $\kappa$ B activation in  
TNF- $\alpha$ -stimulated HUVEC cells.

**Figure S2.** Diagram showing pathways that mediate the inhibition of expression of  
ICAM-1 and adhesion of HL-60 cells to HUVEC cells by andrographolide (**1**) under

inflammatory conditions.

**Figure S1**

**A**

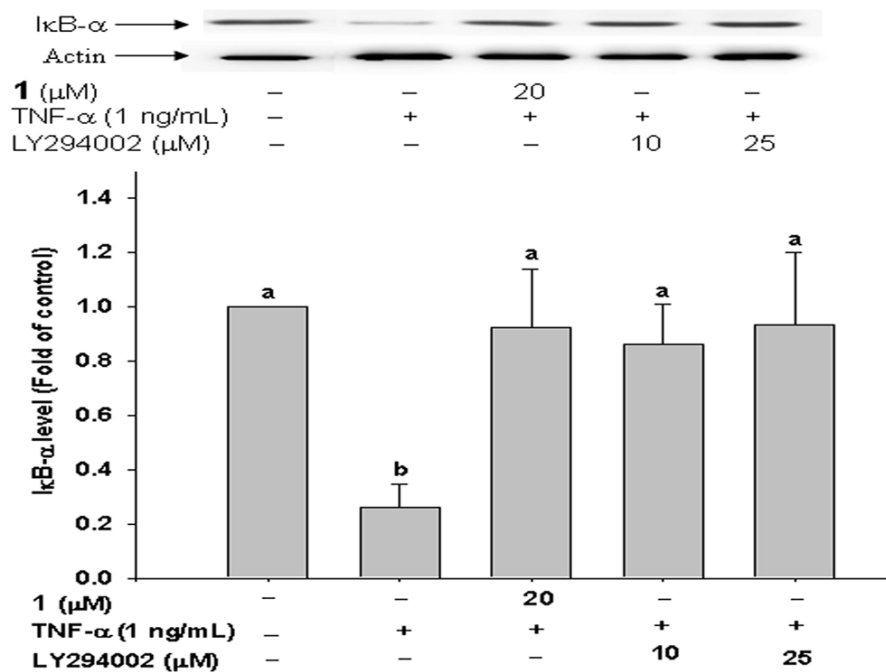

**B**

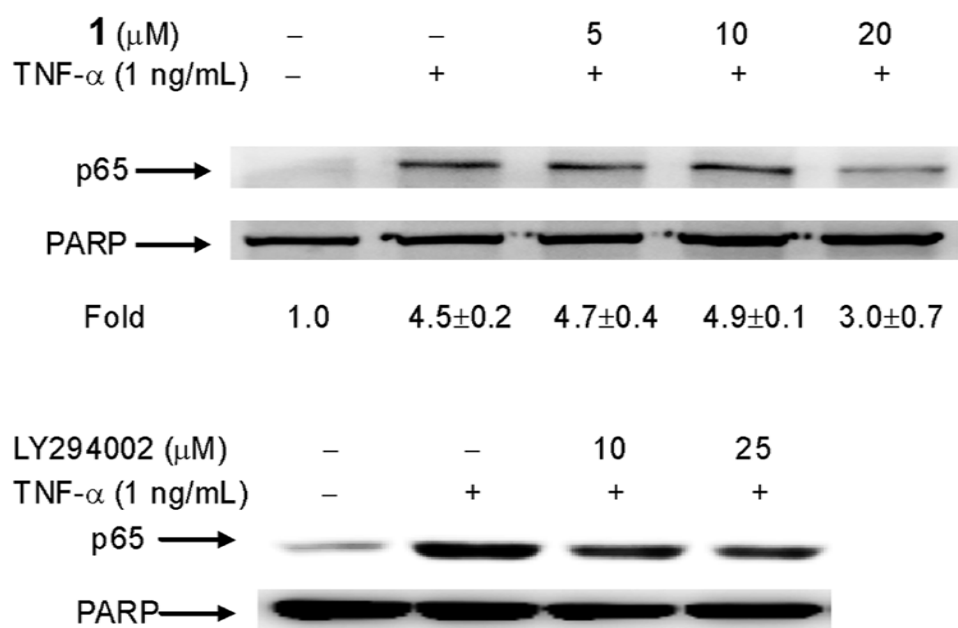

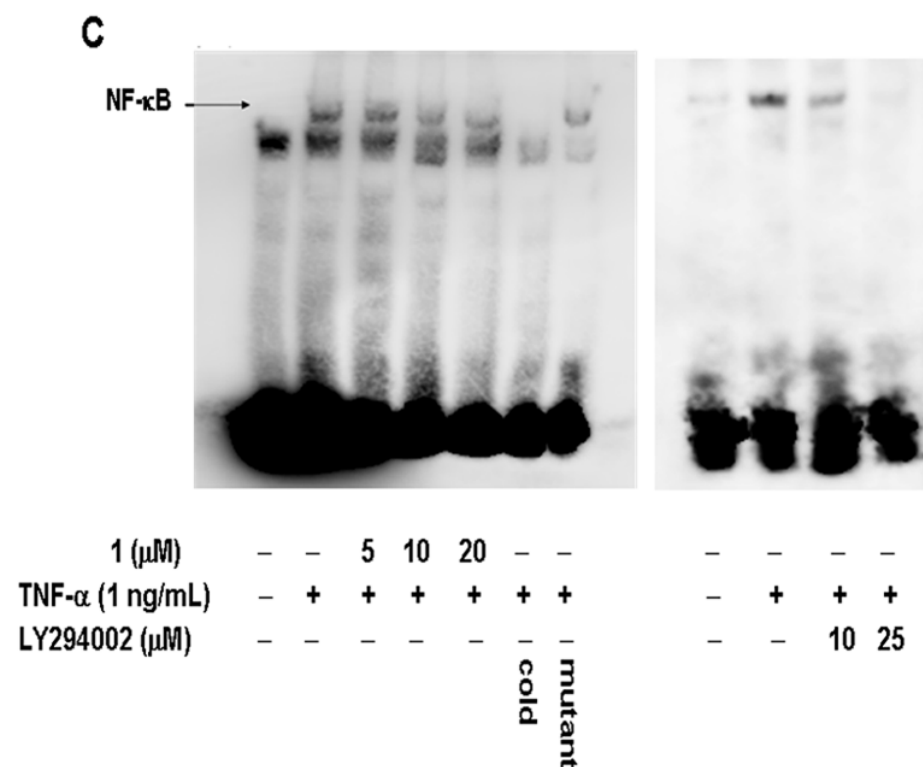

**Figure S1.** Effects of andrographolide (**1**) and LY294002 on NF-κB activation in TNF-α-stimulated HUVEC cells. Cells were pretreated with indicated concentrations of andrographolide (**1**) and LY294002 for 16 h before being challenged with 1 ng/mL TNF-α for an additional 15 min (for IκB-α) and 30 min (for p65 nuclear protein). Western blot analysis was used to measure the protein expression (A and B for IκB-α and p65 nuclear protein, respectively) and EMSA was used to measure NF-κB nuclear protein DNA-binding activity (C). The unlabeled double-stranded oligonucleotides of NF-κB and mutant NF-κB were added for the competition assay and specificity assay, respectively. Bands were detected by using streptavidin-horseradish peroxidase and

were developed using a SuperSignal West Pico kit (Pierce Chemical Co). Values are means  $\pm$  SD of three independent experiments, and values not designated by the same letter are significantly different ( $p < 0.05$ ).

**Figure S2**

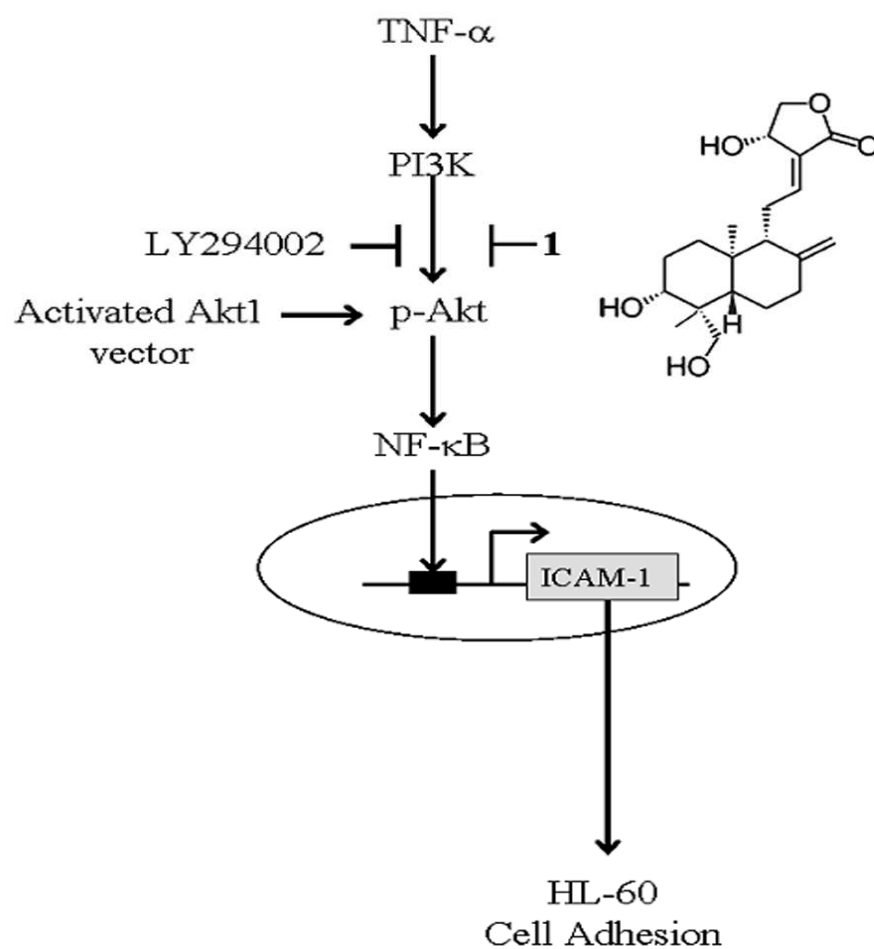

**Figure S2.** Diagram showing pathways that mediate the inhibition of expression of ICAM-1 and adhesion of HL-60 cells to HUVEC cells by andrographolide (**1**) under

inflammatory conditions. Compound **1** inhibits TNF- $\alpha$ -induced PI3K/Akt pathway and downstream target NF- $\kappa$ B activation which lead to reduced ICAM-1 expression and subsequent HL-60 cell adhesion.
